# Supplementary material for: Loss of MMP-27 Predicts Mandibular Bone Invasion in Oral Squamous Cell Carcinoma
Source: MDPI journal article supplement (doi:10.3390/cancers14164044), 2022-08-22
Supplement: s1 [file s1]

**Supplementary Table S1:** Table overview of patients’ characteristics and association with staining results or WPOI grade, respectively. Nuclear OPG and WPOI grade were not significantly associated with either clinical or histological parameters. Significant results are highlighted in bold.

| Parameter                             | N = 119    | MMP-27 (N = 119) |            |                 | RANKL (N = 119) |            |                 | OPG (N = 85) |            |                 | OPG nucleus (N = 34) |            |                 | WPOI grade     |            |                 |
|---------------------------------------|------------|------------------|------------|-----------------|-----------------|------------|-----------------|--------------|------------|-----------------|----------------------|------------|-----------------|----------------|------------|-----------------|
|                                       |            | Low              | High       | <i>p</i> -value | Negative        | Positive   | <i>p</i> -value | Low          | High       | <i>p</i> -value | Low                  | High       | <i>p</i> -value | Non-aggressive | Aggressive | <i>p</i> -value |
| Age<br>(mean 62.2 years; 38-89 years) |            |                  |            |                 |                 |            |                 |              |            |                 |                      |            |                 |                |            |                 |
| >62 years                             | 51 (42.9%) | 23 (45.1%)       | 28 (54.9%) |                 | 33 (64.7%)      | 18 (35.3%) |                 | 19 (46.3%)   | 22 (53.7%) |                 | 8                    | 2          |                 | 23             | 28         |                 |
|                                       |            |                  |            |                 |                 |            |                 |              |            | <b>0.016</b>    | (80.0%)              | (20.0%)    | 0.251           | (45.1%)        | (54.9%)    |                 |
| <62 years                             | 68 (57.1%) | 34 (50.0%)       | 34 (50.0%) |                 | 40 (58.8%)      | 28 (42.2%) |                 | 32 (72.7%)   | 12 (27.3%) |                 | 13 (54.2%)           | 11 (45.8%) |                 | 38             | 30         |                 |
|                                       |            |                  |            | 0.711           |                 |            | 0.571           |              |            |                 |                      |            |                 | (55.9%)        | (44.1%)    | 0.270           |
| Sex                                   |            |                  |            |                 |                 |            |                 |              |            |                 |                      |            |                 |                |            |                 |
|                                       | 95 (79.8%) | 44 (46.3%)       | 51         |                 | 58 (61.0%)      | 37 (39.0%) |                 | 42 (62.7%)   | 25 (37.3%) |                 | 17 (60.7%)           | 11 (39.3%) |                 | 49             | 46         |                 |
| Male                                  |            |                  | (53.7%)    |                 |                 |            |                 |              |            |                 |                      |            |                 | (51.6%)        | (48.4%)    |                 |
| Female                                | 24 (20.2%) | 13 (54.2%)       | 11 (53.0%) |                 | 15 (62.5%)      | 9          |                 | 9            | 9          |                 | 4                    | 2          |                 | 12             | 12         |                 |
|                                       |            |                  |            | 0.504           |                 | (37.5%)    | 1.000           | (50.0%)      | (50.0%)    | 0.418           | (66.7%)              | (33.3%)    | 1.000           | (50.0%)        | (50.0%)    | 1.000           |
| Anatomic Site                         |            |                  |            |                 |                 |            |                 |              |            |                 |                      |            |                 |                |            |                 |
| Gingiva                               | 53 (44.5%) | 26 (49.1%)       | 27 (50.9%) |                 | 30 (56.6%)      | 23 (43.4%) |                 | 24 (57.1%)   | 18 (42.9%) |                 | 6                    | 5          |                 | 27             | 26         |                 |
|                                       |            |                  |            |                 |                 |            |                 |              |            |                 | (54.5%)              | (45.5%)    |                 | (50.9%)        | (49.1%)    |                 |
| Floor of mouth                        | 66 (55.5%) | 31 (47.0%)       | 35 (53.0%) |                 | 43 (66.2%)      | 23 (33.8%) |                 | 27 (62.8%)   | 16 (37.2%) |                 | 15 (65.2%)           | 8          |                 | 34             | 32         |                 |
|                                       |            |                  |            | 0.855           |                 |            | 0.352           |              |            | 0.661           |                      | (34.8%)    | 0.709           | (51.5%)        | (48.5%)    | 1.000           |
| Tobacco use                           |            |                  |            |                 |                 |            |                 |              |            |                 |                      |            |                 |                |            |                 |
| Yes                                   | 95 (73.9%) | 46 (48.4%)       | 49 (51.6%) |                 | 58 (61.0%)      | 37 (39.0%) |                 | 44 (66.7%)   | 22 (33.3%) |                 | 17 (58.6%)           | 12 (41.4%) |                 | 49             | 46         |                 |
|                                       |            |                  |            |                 |                 |            |                 |              |            |                 |                      |            |                 | (51.6%)        | (48.4%)    |                 |
| No                                    | 24 (20.2%) | 11 (45.8%)       | 13 (54.2%) |                 | 15 (62.5%)      | 9          |                 | 7            | 12 (63.2%) |                 | 4                    | 1          |                 | 12             | 12         |                 |
|                                       |            |                  |            | 1.000           |                 | (37.5%)    | 1.000           | (36.8%)      |            | <b>0.032</b>    | (80.0%)              | (20.0%)    | 0.627           | (50.0%)        | (50.0%)    | 1.000           |
| Alcohol use                           |            |                  |            |                 |                 |            |                 |              |            |                 |                      |            |                 |                |            |                 |
| Yes                                   | 88 (73.9%) | 43 (48.9%)       | 45 (51.1%) |                 | 54 (61.4%)      | 34 (38.6%) |                 | 38 (63.3%)   | 22 (36.7%) |                 | 18 (64.3%)           | 10 (35.7%) |                 | 47             | 41         |                 |
|                                       |            |                  |            |                 |                 |            |                 |              |            |                 |                      |            |                 | (53.4%)        | (46.6%)    |                 |
| No                                    | 31 (26.1%) | 14 (45.2%)       | 17 (54.8%) |                 | 19 (61.3%)      | 12 (38.7%) |                 | 13           | 12 (48.0%) |                 | 3                    | 3          |                 | 14             | 17         |                 |
|                                       |            |                  |            | 0.835           |                 |            | 0.655           | (52.0%)      |            | 0.467           | (50.0%)              | (50.0%)    | 0.653           | (45.2%)        | (54.8%)    | 0.532           |
| T-Stage                               |            |                  |            |                 |                 |            |                 |              |            |                 |                      |            |                 |                |            |                 |
| T2 + T3                               | 55 (46.6%) | 20 (36.4%)       | 35 (63.6%) |                 | 36 (65.5%)      | 19 (34.5%) |                 | 17 (48.6%)   | 18 (51.4%) |                 | 11                   | 9          |                 | 27             | 28         |                 |
|                                       |            |                  |            |                 |                 |            |                 |              |            |                 | (55.0%)              | (45.0%)    |                 | (50.9%)        | (49.1%)    |                 |
| T4a                                   | 64 (53.8%) | 37 (57.8%)       | 27 (42.2%) |                 | 37 (57.8%)      | 27 (42.2%) |                 | 34 (68.0%)   | 16 (32.0%) |                 | 10 (71.4%)           | 4          |                 | 33             | 31         |                 |
|                                       |            |                  |            | <b>0.027</b>    |                 |            | 0.452           |              |            | 0.115           |                      | (28.6%)    | 0.477           | (51.6%)        | (48.4%)    | 0.855           |
| N-Stage                               |            |                  |            |                 |                 |            |                 |              |            |                 |                      |            |                 |                |            |                 |
| N0                                    | 57 (47.9%) | 27 (47.4%)       | 30 (52.6%) |                 | 30 (52.6%)      | 27 (47.4%) |                 | 23 (54.8%)   | 19 (45.2%) |                 | 11 (73.3%)           | 4          |                 | 32             | 25         |                 |
|                                       |            |                  |            |                 |                 |            |                 |              |            |                 |                      | (26.7%)    |                 | (56.1%)        | (43.9%)    |                 |
| N+                                    | 62 (52.1%) | 30 (48.4%)       | 32 (51.6%) | 1.000           | 43 (69.4%)      | 19 (30.6%) | 0.089           | 28 (65.1%)   | 15 (34.9%) | 0.380           | 10 (52.6%)           | 9          | 0.296           | 29             | 33         | 0.360           |

|                  |             |            |            |              |            |            |       |            |            |              |            |         |         |         |         |       |
|------------------|-------------|------------|------------|--------------|------------|------------|-------|------------|------------|--------------|------------|---------|---------|---------|---------|-------|
|                  |             |            |            |              |            |            |       |            |            | (47.4%)      |            | (46.8%) | (53.2%) |         |         |       |
| UICC Stage       |             |            |            |              |            |            |       |            |            |              |            |         |         |         |         |       |
| II + III         | 37 (28.8%)  | 18 (48.6%) | 19 (51.4%) |              | 21 (56.8%) | 16 (43.2%) |       | 14 (53.8%) | 12 (46.2%) | 8            | 3          |         | 22      | 15      |         |       |
|                  |             |            |            |              |            |            |       |            |            | (72.7%)      | (27.3%)    |         | (59.5%) | (40.5%) |         |       |
| IV               | 82 (72.2%)  | 39 (47.6%) | 43 (52.4%) |              | 52 (63.4%) | 30 (36.6%) |       | 37 (62.7%) | 22 (37.3%) | 13 (56.5%)   | 10 (43.5%) |         | 39      | 43      |         |       |
|                  |             |            |            | 1.000        |            |            | 0.544 |            |            | 0.478        |            |         | 0.465   | (47.6%) | (52.4%) | 0.242 |
| Grade            |             |            |            |              |            |            |       |            |            |              |            |         |         |         |         |       |
| G1 + G2          | 101 (84.9%) | 44 (43.6%) | 57 (56.4%) |              | 64 (63.4%) | 37 (36.6%) |       | 41 (56.9%) | 31 (43.1%) | 19 (65.5%)   | 10 (34.5%) |         | 53      | 48      |         |       |
|                  |             |            |            |              |            |            |       |            |            |              |            |         | (52.5%) | (47.5%) |         |       |
| G3               | 18 (15.1%)  | 13 (72.2%) | 5          |              | 9          | 9          |       | 10 (76.9%) | 3          | 2            | 3          |         | 8       | 10      |         |       |
|                  |             |            | (27.8%)    | <b>0.039</b> | (50.0%)    | (50.0%)    | 0.304 |            | (23.1%)    | 0.277        | (60.0%)    | (40.0%) | 0.348   | (44.4%) | (55.6%) | 0.613 |
| Tumor Recurrence |             |            |            |              |            |            |       |            |            |              |            |         |         |         |         |       |
| Yes              | 36 (30.3%)  | 14 (38.9%) | 22 (61.1%) |              | 19 (52.8%) | 17 (47.2%) |       | 12 (57.1%) | 9          | 12 (80.0%)   | 3          |         | 18      | 18      |         |       |
|                  |             |            |            |              |            |            |       |            | (42.9%)    |              | (20.0%)    |         | (50.0%) | (50.0%) |         |       |
| No               | 83 (69.7%)  | 43 (51.8%) | 40 (48.2%) |              | 53 (63.9%) | 30 (36.1%) |       | 39 (60.9%) | 25 (29.1%) | 9            | 10 (52.6%) |         | 43      | 40      |         |       |
|                  |             |            |            | 0.233        |            |            | 0.309 |            |            | 0.801        | (47.4%)    |         | 0.079   | (51.8%) | (48.2%) | 1.000 |
| WPOI grade       |             |            |            |              |            |            |       |            |            |              |            |         |         |         |         |       |
| Non-aggressive   | 61 (51.3%)  | 29 (47.5%) | 32 (52.5%) |              | 30 (49.2%) | 31 (50.8%) |       | 33 (70.2%) | 14 (29.8%) | 10 (71.4%)   | 4          |         |         |         |         |       |
|                  |             |            |            |              |            |            |       |            |            |              | (28.6%)    |         |         |         |         |       |
| Aggressive       | 58 (48.7%)  | 28 (48.3%) | 30 (51.7%) |              | 33 (56.9%) | 25 (43.1%) |       | 18 (47.4%) | 20 (52.6%) | 11 (55.0%)   | 9          |         |         |         |         |       |
|                  |             |            |            | 1.000        |            |            | 0.464 |            |            | <b>0.045</b> | (45.0%)    |         | 0.477   |         |         |       |

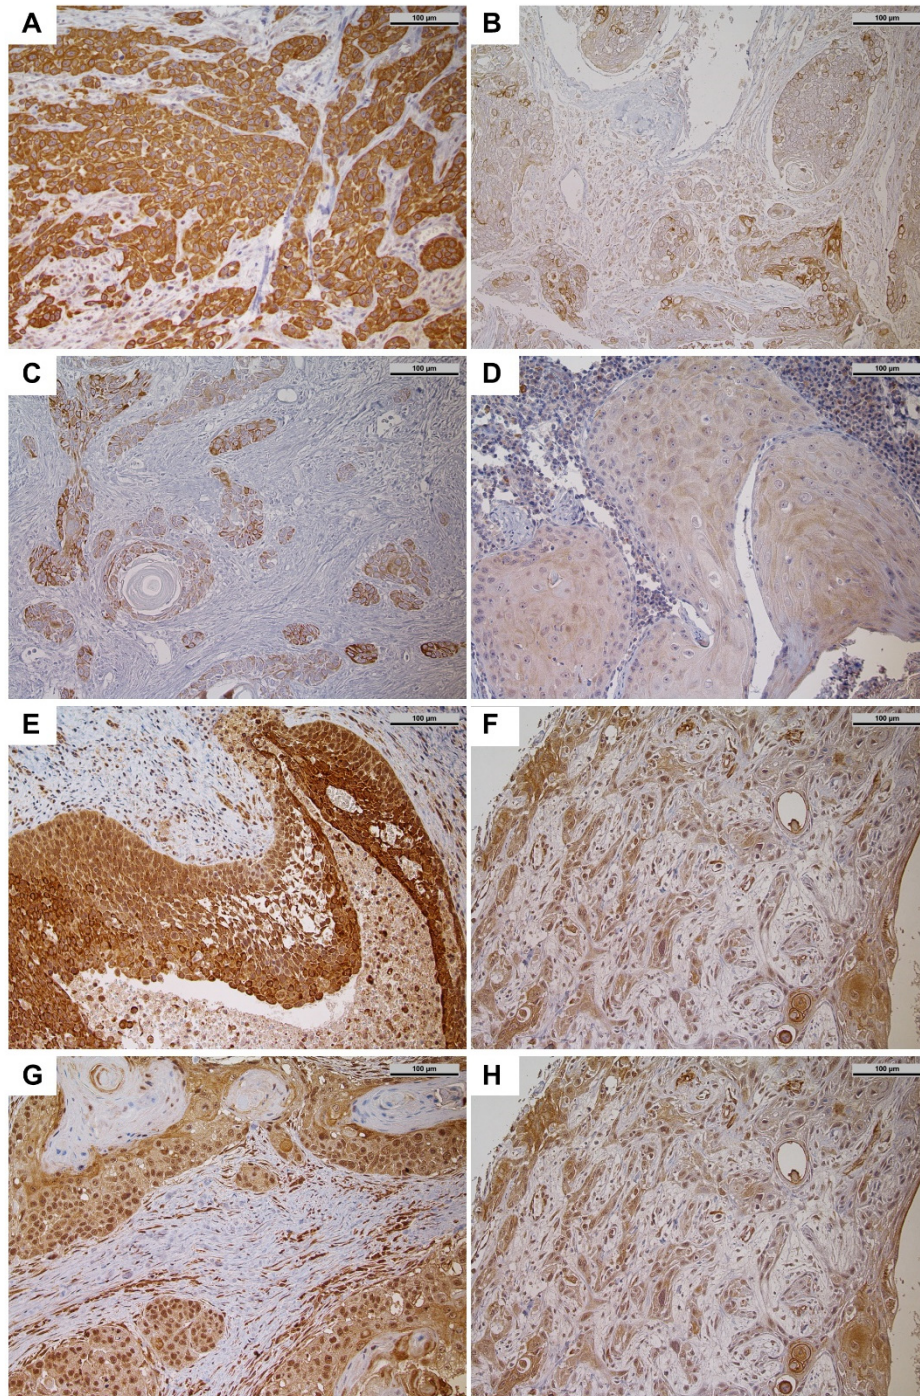

**Supplementary Figure S1:** Overview of different staining results for MMP-27, RANKL and OPG in tumor samples (200x magnification). **A** and **B** MMP-27 exclusively exhibited membranous staining. **A** High expression of MMP-27, determined as H-Score of 300. **B** Low expression MMP-27, rated with a maximum H-Score of 40. **C** and **D** RANKL only showed membranous staining. **C** OSCC with positive RANKL expression, determined as 3 or more than 50%. **D** OSCC with negative RANKL expression, determined as 1 or less than 10%. **E-H** OPG demonstrated either cytoplasmic (**E,F**) or nuclear (**G,H**) staining. **E** High expression of cytoplasmic OPG, rated with an H-Score of 285. **F** Low cytoplasmic expression of OPG, determined as H-Score of 50. **G** For comparison, a tumor with high nuclear expression of OPG, determined as H-Score of 180. **H** OSCC with low nuclear expression of OPG, rated with an H-Score of 35.

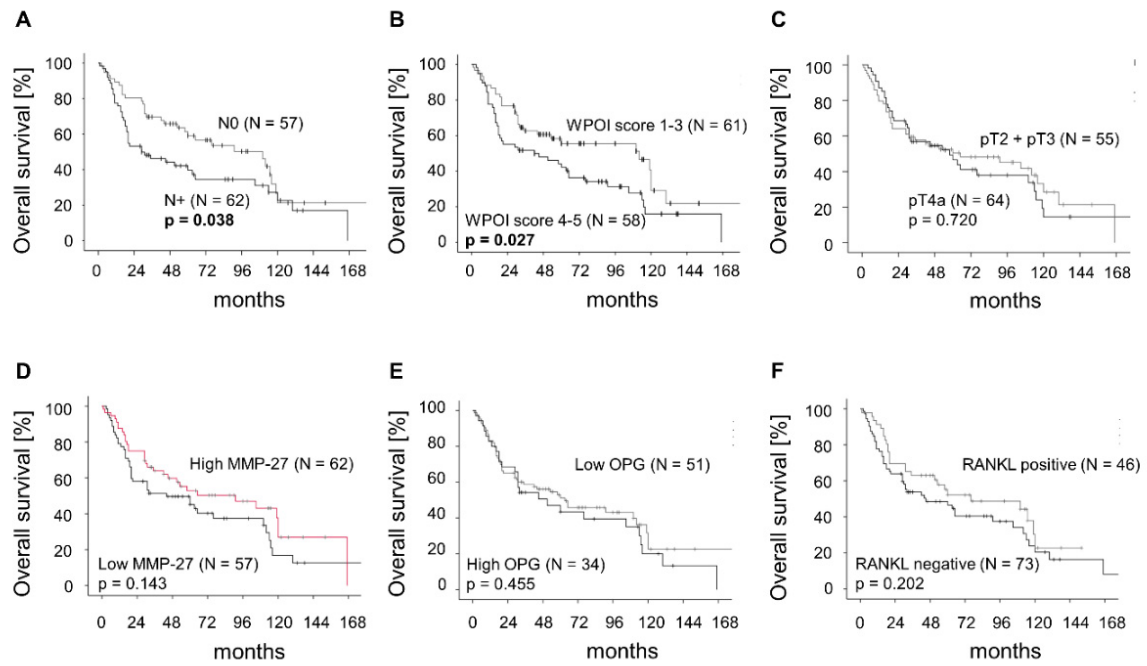

**Supplementary Figure S2:** Overview of Kaplan-Meier survival analysis of the TMA cohort. **A** and **B** As described in the text, metastasis to cervical lymph node predicted worse OS in the TMA cohort ( $p = 0.038$ ) **B** A high WPOI grade of  $\geq 4$  was also indicative of unfavorable OS ( $p = 0.027$ ). **C** Comparing pT4a to pT2 and pT3 together, no effect on outcome could be demonstrated. Patients presenting with pT4a had a slightly worse OS, although not statistically significant ( $p = 0.720$ ) **D–F** Neither MMP-27 nor OPG or RANKL had an impact on outcome in the TMA cohort.

**Supplementary Table S2:** OS analysis of TMA patients using univariate and multivariate Cox regression analysis.

Relapse of any kind was a significant predictor for OS in uni- and multivariate analysis. HR = Hazard ratio; CI = Confidence interval. Significant results are highlighted in bold.

|                | Univariate Cox regression |               |                     | Multivariate Cox regression |               |                     |
|----------------|---------------------------|---------------|---------------------|-----------------------------|---------------|---------------------|
|                | <i>p</i>                  | HR            | 95% CI              | <i>p</i>                    | HR            | 95% CI              |
| High MMP27     | 0.148                     | 0.712         | 0.449–1.129         |                             |               |                     |
| RANKL          | –0.182                    | 0.207         | 0.454–1.187         |                             |               |                     |
| High OPG       | 0.460                     | 1.198         | 0.742–1.935         |                             |               |                     |
| T4a            | 0.689                     | 0.907         | 0.563–1.461         |                             |               |                     |
| WPOI grade 4-5 | <b>0.030</b>              | <b>1.673</b>  | <b>1.052–2.659</b>  |                             |               |                     |
| N+             | <b>0.042</b>              | <b>1.619</b>  | <b>1.018–2.576</b>  |                             |               |                     |
| Relapse (any)  | <b>&lt;0.001</b>          | <b>20.018</b> | <b>4.906–81.686</b> | <b>&lt;0.001</b>            | <b>19.305</b> | <b>4.698–79.325</b> |
